# Supplementary material for: A promising yellow-emitting langbeinite-type phosphor NaBaY2(PO4)3:Eu2+ for WLEDs
Source: Royal Society of Chemistry journal article supplement (doi:10.1039/d3dt03467d), 2023-12-01
Supplement: d3dt03467d1.pdf [file d3dt03467d1.pdf]

## Supplementary Information for

### A promising yellow-emitting langbeinite-type phosphor $\text{NaBaY}_2(\text{PO}_4)_3: \text{Eu}^{2+}$ for WLEDs

Qiang Zhang<sup>a,b</sup>, Xin Ding<sup>c</sup>, Bin Liu<sup>a,\*</sup> and Yuhua Wang<sup>b,\*</sup>

<sup>a</sup> School of Stomatology, Lanzhou University, Lanzhou, PR China

<sup>b</sup> National and Local Joint Engineering Laboratory for Optical Conversion Materials and Technology of National Development and Reform Commission, Department of Materials Science, School of Materials and Energy, Lanzhou University, Lanzhou, PR China

<sup>c</sup> College of Materials Science and Engineering, Qingdao University, Ningxia Road NO. 308, Qingdao 266071, PR China

Corresponding author's email: liubkq@lzu.edu.cn; wyh@lzu.edu.cn

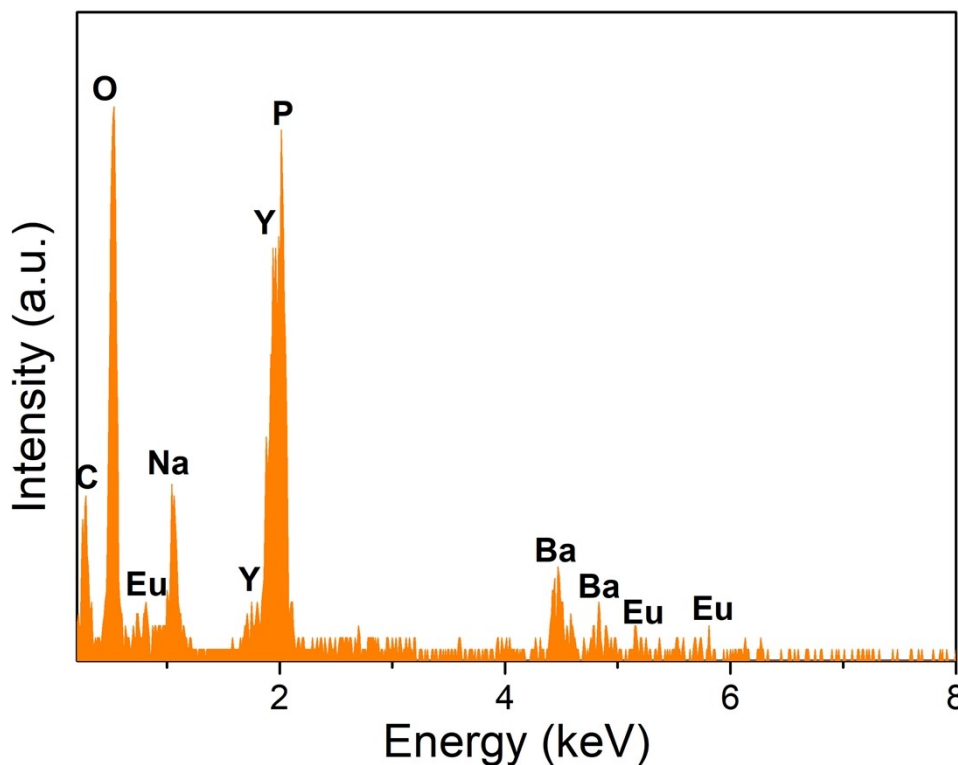

Fig. S1 EDS spectrum of the representative sample NBYP: 0.01Eu<sup>2+</sup>.

Table S1 Crystallographic parameters for NBYP host.

| Formula                | NaBaY <sub>2</sub> (PO <sub>4</sub> ) <sub>3</sub> |
|------------------------|----------------------------------------------------|
| Symmetry               | cubic                                              |
| Space group            | <i>P</i> 2 <sub>1</sub> 3                          |
| <i>a</i> / Å           | 10.1912(5)                                         |
| <i>b</i> / Å           | 10.1912(5)                                         |
| <i>c</i> / Å           | 10.1912(5)                                         |
| $\alpha$               | 90.0                                               |
| $\beta$                | 90.0                                               |
| $\gamma$               | 90.0                                               |
| Volume/ Å <sup>3</sup> | 1058.46(17)                                        |
| <i>Z</i>               | 4                                                  |
| <i>R</i> <sub>wp</sub> | 8.68%                                              |
| <i>R</i> <sub>p</sub>  | 6.96%                                              |
| $\chi^2$               | 1.539                                              |

Table S2 Atomic coordinates for NBYP host.

| Atom     | <i>x</i>  | <i>y</i>  | <i>z</i>   | <i>Occ.</i> | Uiso      |
|----------|-----------|-----------|------------|-------------|-----------|
| Na/Ba(1) | 0.8073(8) | 0.8073(8) | 0.8073(8)  | 1.0         | 0.0725(4) |
| Na/Ba(2) | 0.0540(1) | 0.0540(1) | 0.0540(1)  | 1.0         | 0.0312(5) |
| Y(1)     | 0.3208(2) | 0.3208(2) | 0.3208(2)  | 1.0         | 0.0593(7) |
| Y(2)     | 0.5825(9) | 0.5825(9) | 0.5825(9)  | 1.0         | 0.0569(3) |
| P        | 0.2228(7) | 0.3589(1) | 0.0130(2)  | 1.0         | 0.0376(9) |
| O(1)     | 0.3398(8) | 0.2930(4) | -0.0554(9) | 1.0         | 0.1057(4) |
| O(2)     | 0.0891(6) | 0.2566(8) | 0.0236(7)  | 1.0         | 0.0831(4) |
| O(3)     | 0.2035(6) | 0.4846(4) | -0.0953(5) | 1.0         | 0.0947(9) |
| O(4)     | 0.2882(7) | 0.4475(4) | 0.1073(1)  | 1.0         | 0.1377(7) |

Table. S3 The bond length (Å) of Na/Ba1-O and Na/Ba2-O.

|           |        |           |        |
|-----------|--------|-----------|--------|
| Na/Ba1-O3 | 2.7951 | Na/Ba2-O1 | 2.8878 |
| Na/Ba1-O3 | 2.7951 | Na/Ba2-O1 | 2.8878 |
| Na/Ba1-O3 | 2.7951 | Na/Ba2-O1 | 2.8878 |
| Na/Ba1-O4 | 2.6642 | Na/Ba2-O2 | 2.4626 |
| Na/Ba1-O4 | 2.6642 | Na/Ba2-O2 | 2.4626 |
| Na/Ba1-O4 | 2.6642 | Na/Ba2-O2 | 2.4626 |
| Average   | 2.7297 | Average   | 2.6752 |
